# Supplementary material for: Difference in Aroma Components of Black Teas Processed on Different Dates in the Spring Season
Source: MDPI journal article supplement (doi:10.3390/foods12234368), 2023-12-04
Supplement: s1 [file s1]

# Difference in Aroma Components of Black Teas Processed on Different Dates in the Spring Season

Penghui Yu <sup>1,†</sup>, Yingjie Huang <sup>2,†</sup>, Ziyi Li <sup>2</sup>, Xi Zhao <sup>1</sup>, Hao Huang <sup>1</sup>, Ni Zhong <sup>1</sup>, Hongfa Zheng <sup>1,\*</sup> and Qincao Chen <sup>2,\*</sup>

<sup>1</sup> Tea Research Institute, Hunan Academy of Agricultural Sciences, Changsha 410125, China; yphuihui@163.com (P.Y.); lzzx\_11280609@163.com (X.Z.); haohuang\_08@163.com (H.H.); daren\_ni@163.com (N.Z.)

<sup>2</sup> College of Agriculture, Jiangxi Agricultural University, Nanchang 330045, China; hyj605791@163.com (Y.H.); 18931077210@163.com (Z.L.)

\* Correspondence: hncyszfh@hunaas.cn (H.Z.); chenqincao@jxau.edu.cn (Q.C.)

† These authors contributed equally to this work.

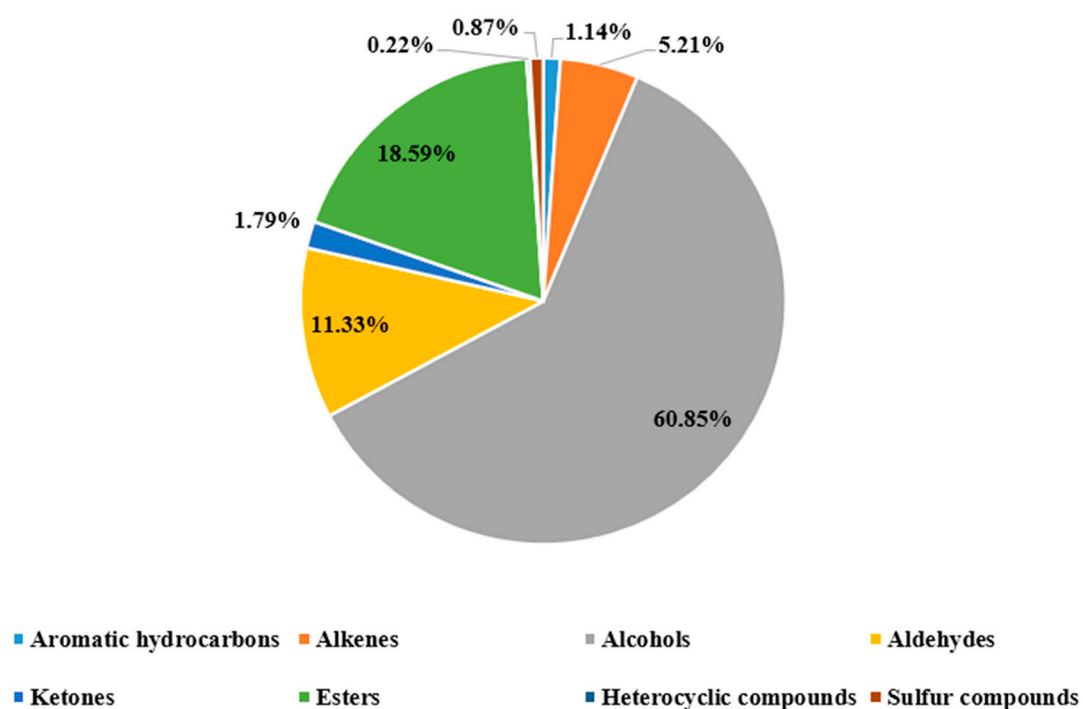

Figure S1. The average proportion (%) of different kinds of volatile compounds in black tea samples

Table S1. The changes in Flavor Index of various kinds of volatile compounds

|                             | ZYQ-1 | ZYQ-2 | ZYQ-3 | ZYQ-4 | ZYQ-5 |
|-----------------------------|-------|-------|-------|-------|-------|
| Flavor Index                | 11.66 | 23.25 | 18.86 | 17.58 | 11.02 |
| VTs/non-ester FADVs         | 8.47  | 16.64 | 13.07 | 12.30 | 6.85  |
| AADVs/non-ester FADVs       | 2.61  | 5.68  | 5.04  | 4.58  | 3.60  |
| Ester FADVs/non-ester FADVs | 0.22  | 0.45  | 0.30  | 0.30  | 0.11  |
| CDVs/non-ester FADVs        | 0.35  | 0.48  | 0.45  | 0.41  | 0.46  |

Table S2. The fold changes of Flavor Index of various kinds of volatile compounds

|                             | ZYQ-1 | ZYQ-2 | ZYQ-3 | ZYQ-4 | ZYQ-5 |
|-----------------------------|-------|-------|-------|-------|-------|
| Flavor Index                | 1.00  | 1.99  | 1.62  | 1.51  | 0.95  |
| VTs/non-ester FADVs         | 1.00  | 1.96  | 1.54  | 1.45  | 0.81  |
| AADVs/non-ester FADVs       | 1.00  | 2.17  | 1.93  | 1.75  | 1.38  |
| Ester FADVs/non-ester FADVs | 1.00  | 2.05  | 1.37  | 1.37  | 0.52  |
| CDVs/non-ester FADVs        | 1.00  | 1.35  | 1.26  | 1.15  | 1.38  |
